# Supplementary material for: Rapamycin Attenuated Cardiac Hypertrophy Induced by Isoproterenol and Maintained Energy Homeostasis via Inhibiting NF-κB Activation
Source: Hindawi journal article supplement (doi:10.1155/2014/868753), 2014-01-01

Fig. S1

A

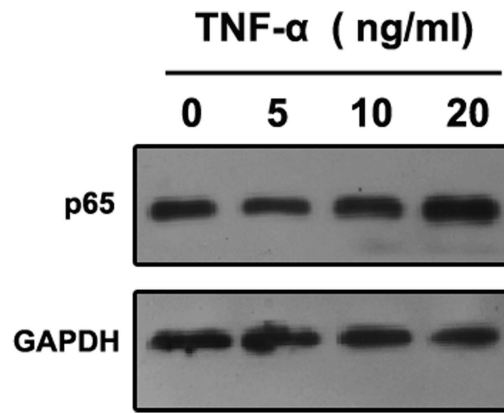

B

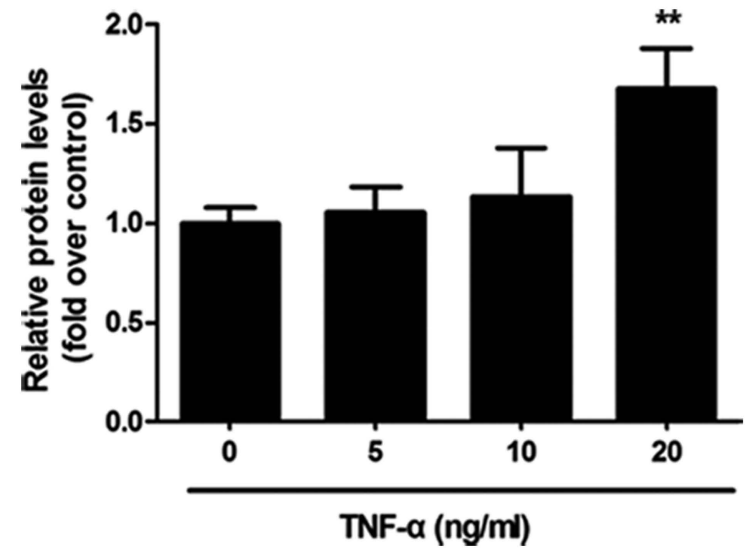

C

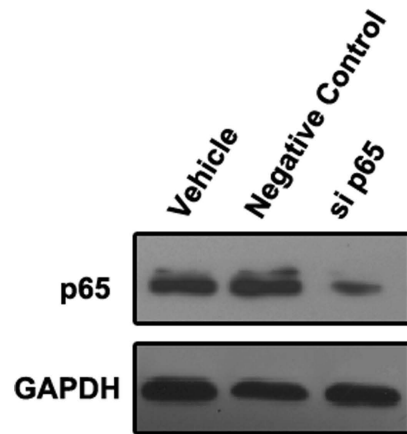

D

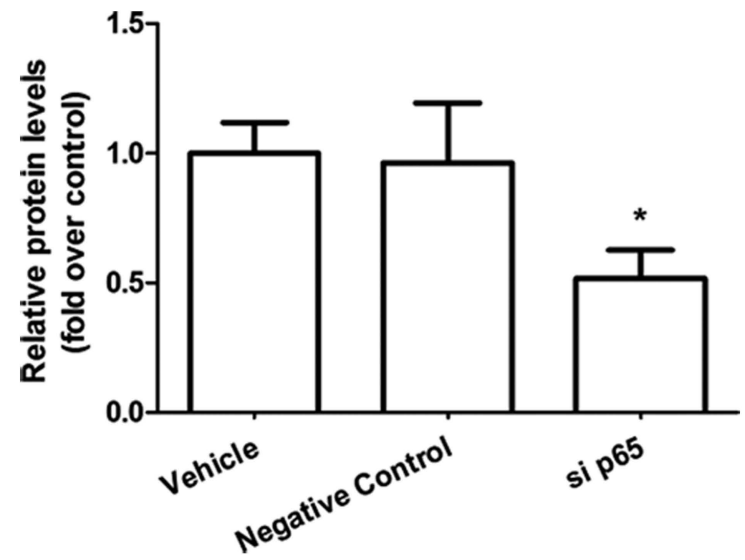

Supplement: f1 [file 868753.f1.pdf]
